# Supplementary material for: Investigating the impact of enhanced community case management and monthly screening and treatment on the transmissibility of malaria infections in Burkina Faso: study protocol for a cluster-randomised trial
Source: PubMed Central journal article supplement (PMC6747640; doi:10.1136/bmjopen-2019-030598), 2019-09-13
Supplement: bmjopen-2019-030598supp001.pdf [file bmjopen-2019-030598supp001.pdf]

Supplementary Information

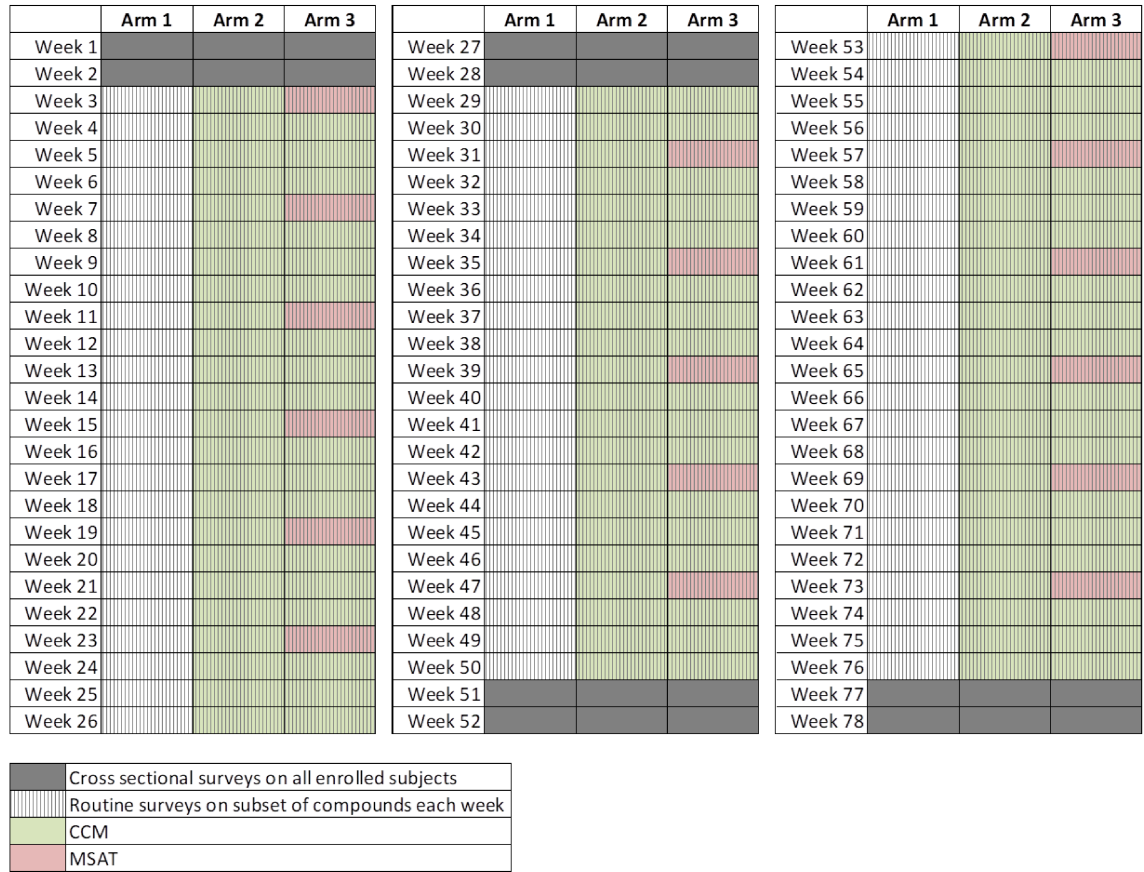

**Figure S1. Timetable of trial activities**

CCM = enhanced community case management; MSAT = monthly screening and treatment

| Data category                                 | Information                                                                                                                                                                                                                                                                                                                                                                                                                                                                                                                                                                                                                                                                                                                                                                                                                                                                                                                                                                   |
|-----------------------------------------------|-------------------------------------------------------------------------------------------------------------------------------------------------------------------------------------------------------------------------------------------------------------------------------------------------------------------------------------------------------------------------------------------------------------------------------------------------------------------------------------------------------------------------------------------------------------------------------------------------------------------------------------------------------------------------------------------------------------------------------------------------------------------------------------------------------------------------------------------------------------------------------------------------------------------------------------------------------------------------------|
| Primary registry and trial identifying number | ClinicalTrials.gov: NCT03705624                                                                                                                                                                                                                                                                                                                                                                                                                                                                                                                                                                                                                                                                                                                                                                                                                                                                                                                                               |
| Date of registration in primary registry      | July 19, 2018                                                                                                                                                                                                                                                                                                                                                                                                                                                                                                                                                                                                                                                                                                                                                                                                                                                                                                                                                                 |
| Secondary identifying numbers                 | INDIE-1a                                                                                                                                                                                                                                                                                                                                                                                                                                                                                                                                                                                                                                                                                                                                                                                                                                                                                                                                                                      |
| Source(s) of monetary or material support     | The Bill and Melinda Gates Foundation                                                                                                                                                                                                                                                                                                                                                                                                                                                                                                                                                                                                                                                                                                                                                                                                                                                                                                                                         |
| Primary sponsor                               | London School of Hygiene and Tropical Medicine<br>Keppel Street<br>London WC1E 7HT<br>Tel: +44 207 927 2626<br>Email: RGIO@lshtm.ac.uk                                                                                                                                                                                                                                                                                                                                                                                                                                                                                                                                                                                                                                                                                                                                                                                                                                        |
| Secondary sponsor(s)                          | N/A                                                                                                                                                                                                                                                                                                                                                                                                                                                                                                                                                                                                                                                                                                                                                                                                                                                                                                                                                                           |
| Contact for public queries                    | Teun Bousema, PhD +31 0243617574 (teun.bousema@radboudumc.nl)<br>Katharine Collins, PhD +31 0243613663 (katharine.collins@radboudumc.nl)<br>Chris Drakeley, PhD +44 02079272289 (chris.drakeley@lshtm.ac.uk)<br>Alfred Tiono, MD, PhD +226 50324695 (t.alfred@fasonet.bf)                                                                                                                                                                                                                                                                                                                                                                                                                                                                                                                                                                                                                                                                                                     |
| Contact for scientific queries                | TeunBousema, PhD +31 243617574 (teun.bousema@radboudumc.nl)<br>Chris Drakeley, PhD +44 2079272289 (chris.drakeley@lshtm.ac.uk)<br>Alfred Tiono, MD, PhD +226 50324695 (t.alfred@fasonet.bf)<br>Katharine Collins, PhD+31 243613663 (katharine.collins@radboudumc.nl)                                                                                                                                                                                                                                                                                                                                                                                                                                                                                                                                                                                                                                                                                                          |
| Public title                                  | P. falciparum Infection Dynamics and Transmission to Inform Elimination (INDIE 1a)                                                                                                                                                                                                                                                                                                                                                                                                                                                                                                                                                                                                                                                                                                                                                                                                                                                                                            |
| Scientific title                              | A cluster-randomized trial investigating the impact of enhanced community case management and monthly screening and treatment on the transmissibility of malaria infections in Burkina Faso                                                                                                                                                                                                                                                                                                                                                                                                                                                                                                                                                                                                                                                                                                                                                                                   |
| Countries of recruitment                      | Burkina Faso                                                                                                                                                                                                                                                                                                                                                                                                                                                                                                                                                                                                                                                                                                                                                                                                                                                                                                                                                                  |
| Health condition(s) or problem(s) studied     | Malaria                                                                                                                                                                                                                                                                                                                                                                                                                                                                                                                                                                                                                                                                                                                                                                                                                                                                                                                                                                       |
| Intervention(s)                               | <u>Arm 1 (control): Standard of care</u> <ul style="list-style-type: none"> <li>Standard of care with passively monitored malaria incidence</li> </ul> <u>Arm 2 (intervention): CCM</u> <ul style="list-style-type: none"> <li>Standard of care plus enhanced Community Case Management for Malaria (CCM) involving weekly active screening for fever. A measured temperature <math>\geq 37.5^{\circ}\text{C}</math> or reported fever in last 24h will prompt screening with a conventional rapid diagnostic test (RDT). RDT positive individuals will be treated with artemether-lumefantrine according to national guidelines</li> </ul> <u>Arm 3 (intervention): CCM + MSAT</u> <ul style="list-style-type: none"> <li>Standard of care with enhanced CCM plus monthly screening and treatment regardless of symptoms using a conventional RDT (MSAT). RDT positive individuals will be treated with artemether-lumefantrine according to national guidelines.</li> </ul> |
| Key inclusion and exclusion criteria          | <u>Inclusion Criteria:</u> <ol style="list-style-type: none"> <li>Participants should be permanent residents of the compound</li> <li>Participants should be willing to participate in repeated assessments of health and infection status and willing to donate a maximum of 37mL of blood (children &lt;10 years of age) or 52mL of blood (older individuals) during an 18-month period</li> </ol> <u>Exclusion Criteria:</u> <ol style="list-style-type: none"> <li>Any (chronic) illness that would affect with study participation</li> <li>Pre-existing severe chronic health conditions</li> </ol>                                                                                                                                                                                                                                                                                                                                                                     |

|                                |                                                                                                                                                                                                                                                                                                                                                                                                                                                                                                                                                                                                                                                                                                                                                                                                                                                                                                                                                                                                                                                                                                                                                                                                                                                                                                                                                                                                                                                                                                                                                                  |
|--------------------------------|------------------------------------------------------------------------------------------------------------------------------------------------------------------------------------------------------------------------------------------------------------------------------------------------------------------------------------------------------------------------------------------------------------------------------------------------------------------------------------------------------------------------------------------------------------------------------------------------------------------------------------------------------------------------------------------------------------------------------------------------------------------------------------------------------------------------------------------------------------------------------------------------------------------------------------------------------------------------------------------------------------------------------------------------------------------------------------------------------------------------------------------------------------------------------------------------------------------------------------------------------------------------------------------------------------------------------------------------------------------------------------------------------------------------------------------------------------------------------------------------------------------------------------------------------------------|
|                                | <ol style="list-style-type: none"> <li>3. Current participation in malaria vaccine trials or participation in such trials in the last 2 years</li> <li>4. History of intolerance to artemether-lumefantrine</li> </ol>                                                                                                                                                                                                                                                                                                                                                                                                                                                                                                                                                                                                                                                                                                                                                                                                                                                                                                                                                                                                                                                                                                                                                                                                                                                                                                                                           |
| <b>Study type</b>              | <p>Interventional<br/> Allocation: randomized<br/> Intervention model: Cluster randomized trial<br/> Masking: none (open label)<br/> Primary purpose: Diagnostic</p>                                                                                                                                                                                                                                                                                                                                                                                                                                                                                                                                                                                                                                                                                                                                                                                                                                                                                                                                                                                                                                                                                                                                                                                                                                                                                                                                                                                             |
| <b>Date of first enrolment</b> | June 2018                                                                                                                                                                                                                                                                                                                                                                                                                                                                                                                                                                                                                                                                                                                                                                                                                                                                                                                                                                                                                                                                                                                                                                                                                                                                                                                                                                                                                                                                                                                                                        |
| <b>Target sample size</b>      | 900                                                                                                                                                                                                                                                                                                                                                                                                                                                                                                                                                                                                                                                                                                                                                                                                                                                                                                                                                                                                                                                                                                                                                                                                                                                                                                                                                                                                                                                                                                                                                              |
| <b>Recruitment status</b>      | Recruiting                                                                                                                                                                                                                                                                                                                                                                                                                                                                                                                                                                                                                                                                                                                                                                                                                                                                                                                                                                                                                                                                                                                                                                                                                                                                                                                                                                                                                                                                                                                                                       |
| <b>Primary outcome(s)</b>      | Parasite prevalence and density between arms by molecular detection at the end of study cross-sectional survey [Time Frame: Month 18 (end of second transmission season; January-February 2020)].                                                                                                                                                                                                                                                                                                                                                                                                                                                                                                                                                                                                                                                                                                                                                                                                                                                                                                                                                                                                                                                                                                                                                                                                                                                                                                                                                                |
| <b>Key secondary outcomes</b>  | <ol style="list-style-type: none"> <li>1. Parasite prevalence and density by molecular detection at the end of year 1 cross-sectional survey [Time Frame: Month 6 (end of first transmission season; January-February 2019)].</li> <li>2. Parasite prevalence and density by molecular detection at the end of the dry season cross-sectional survey [Time Frame: Month 12 (prior to second transmission season; June 2019)].</li> <li>3. Gametocyte prevalence and or density by molecular methods at the end of study cross-sectional survey [Time Frame: Month 18 (end of second transmission season; January-February 2020)].</li> <li>4. Gametocyte prevalence and or density by molecular methods at the end of year 1 cross-sectional survey [Time Frame: Month 6 (end of first transmission season; January-February 2019)].</li> <li>5. Gametocyte prevalence and or density by molecular methods at the end of the dry season cross-sectional [Time Frame: Month 12 (prior to second transmission season; June 2019)].</li> <li>6. Gametocyte prevalence and or density by molecular methods among <i>P. falciparum</i> infections during all visits in the study [Time Frame: Throughout study, an average of 18 months].</li> <li>7. The number of incident infections/clinical incidence detected during CCM, MSAT and passive case detection [Time Frame: Throughout study, an average of 18 months].</li> <li>8. Infectivity to mosquitoes of <i>P. falciparum</i> infections [Time Frame: Throughout study, an average of 18 months].</li> </ol> |

**Table S1. World Health Organization Trial Registration Data Set**
